# Supplementary material
Source: PubMed Central journal article supplement (PMC8702401)
Supplement: mmc1.pdf [file mmc1.pdf]

**Cell, Volume 185**

**Supplemental information**

**The Omicron variant is highly resistant  
against antibody-mediated neutralization:**

**Implications for control of the COVID-19 pandemic**

**Markus Hoffmann, Nadine Krüger, Sebastian Schulz, Anne Cossmann, Cheila Rocha, Amy Kempf, Inga Nehlmeier, Luise Graichen, Anna-Sophie Moldenhauer, Martin S. Winkler, Martin Lier, Alexandra Dopfer-Jablonka, Hans-Martin Jäck, Georg M.N. Behrens, and Stefan Pöhlmann**

**Table S1****COVID-19 patient data (related to Figure 3)**

| <b>Identifier</b> | <b>Type</b>  | <b>Period</b> | <b>Symptoms</b> |
|-------------------|--------------|---------------|-----------------|
| <b>SI15</b>       | Convalescent | 1st wave      | Severe*         |
| <b>SI16</b>       | Convalescent | 1st wave      | Severe*         |
| <b>SI20</b>       | Convalescent | 1st wave      | Severe*         |
| <b>SI22</b>       | Convalescent | 1st wave      | Severe*         |
| <b>SI23</b>       | Convalescent | 1st wave      | Severe*         |
| <b>SI24</b>       | Convalescent | 1st wave      | Severe*         |
| <b>SI27</b>       | Convalescent | 1st wave      | Severe*         |
| <b>SI33</b>       | Convalescent | 1st wave      | Severe*         |
| <b>SI51</b>       | Convalescent | 1st wave      | Severe*         |
| <b>SI56</b>       | Convalescent | 1st wave      | Severe*         |
| <b>463</b>        | Convalescent | 1st wave      | Mild            |
| <b>617</b>        | Convalescent | 1st wave      | Mild            |
| <b>813</b>        | Convalescent | 1st wave      | Mild            |
| <b>1200</b>       | Convalescent | 1st wave      | Mild            |
| <b>1015</b>       | Convalescent | 1st wave      | Severe*         |
| <b>918</b>        | Convalescent | 1st wave      | Mild            |
| <b>1314</b>       | Convalescent | 1st wave      | Mild            |

\*: admission to intensive care unit required

Table S2

## Vaccinated patient data (related to Figure 3)

| Identifier | Vaccination | Gender | Age group (years) | Documented SARS-CoV-2 infection? (yes/no) | Time between 1st and 2nd vaccination (days) | Time between 2nd and 3rd vaccination (days) | Time since last vaccination (days) |
|------------|-------------|--------|-------------------|-------------------------------------------|---------------------------------------------|---------------------------------------------|------------------------------------|
| 4796       | BNT/BNT     | Female | 35-44             | no                                        | 25                                          | n/a                                         | 14                                 |
| 4811       | BNT/BNT     | Female | 25-34             | no                                        | 27                                          | n/a                                         | 15                                 |
| 4801       | BNT/BNT     | Female | 25-34             | no                                        | 20                                          | n/a                                         | 18                                 |
| 4806       | BNT/BNT     | Male   | 25-34             | no                                        | 21                                          | n/a                                         | 19                                 |
| 4804       | BNT/BNT     | Female | 55-64             | no                                        | 25                                          | n/a                                         | 21                                 |
| 4802       | BNT/BNT     | Female | 45-54             | no                                        | 21                                          | n/a                                         | 21                                 |
| 4812       | BNT/BNT     | Male   | 35-44             | no                                        | 20                                          | n/a                                         | 21                                 |
| 4800       | BNT/BNT     | Female | 45-54             | no                                        | 21                                          | n/a                                         | 21                                 |
| 4799       | BNT/BNT     | Male   | 25-34             | no                                        | 18                                          | n/a                                         | 21                                 |
| 4797       | BNT/BNT     | Male   | 35-44             | no                                        | 23                                          | n/a                                         | 22                                 |
| L16        | BNT/BNT     | Female | 18-24             | no                                        | 42                                          | n/a                                         | 72                                 |
| 6187       | AZ/BNT      | Female | 25-34             | no                                        | 65                                          | n/a                                         | 14                                 |
| 6227       | AZ/BNT      | Female | 25-34             | no                                        | 69                                          | n/a                                         | 14                                 |
| 6208       | AZ/BNT      | Female | 55-64             | no                                        | 70                                          | n/a                                         | 14                                 |
| 6043       | AZ/BNT      | Male   | 45-54             | no                                        | 71                                          | n/a                                         | 14                                 |
| 6029       | AZ/BNT      | Female | 35-44             | no                                        | 71                                          | n/a                                         | 14                                 |
| 6025       | AZ/BNT      | Female | 35-44             | no                                        | 71                                          | n/a                                         | 14                                 |
| 6028       | AZ/BNT      | Female | 35-44             | no                                        | 71                                          | n/a                                         | 14                                 |
| 6023       | AZ/BNT      | Female | 55-64             | no                                        | 72                                          | n/a                                         | 14                                 |
| 6054       | AZ/BNT      | Female | 45-54             | no                                        | 77                                          | n/a                                         | 14                                 |
| 6003       | AZ/BNT      | Male   | 35-44             | no                                        | 78                                          | n/a                                         | 14                                 |
| 7539       | BNT/BNT/BNT | Female | 25-34             | no                                        | 21                                          | 260                                         | 14                                 |
| 7533       | BNT/BNT/BNT | Male   | 35-44             | no                                        | 21                                          | 255                                         | 17                                 |
| 7423       | BNT/BNT/BNT | Male   | 25-34             | no                                        | 23                                          | 242                                         | 19                                 |
| 7426       | BNT/BNT/BNT | Male   | 55-64             | no                                        | 21                                          | 235                                         | 19                                 |
| 7532       | BNT/BNT/BNT | Female | 45-54             | no                                        | 22                                          | 253                                         | 19                                 |
| 7580       | BNT/BNT/BNT | Female | 45-54             | no                                        | 23                                          | 262                                         | 20                                 |
| 7773       | BNT/BNT/BNT | Female | 35-44             | no                                        | 17                                          | 261                                         | 21                                 |
| 7562       | BNT/BNT/BNT | Male   | 25-34             | no                                        | 19                                          | 256                                         | 24                                 |
| 7585       | BNT/BNT/BNT | Female | 45-54             | no                                        | 22                                          | 260                                         | 24                                 |
| 7595       | BNT/BNT/BNT | Female | 55-64             | no                                        | 26                                          | 259                                         | 26                                 |
